# Supplementary material for: EBF2 Links KMT2D‐Mediated H3K4me1 to Suppress Pancreatic Cancer Progression via Upregulating KLLN
Source: PubMed Central journal article supplement (PMC10787067; doi:10.1002/advs.202302037), 2023-11-28
Supplement: ADVS-11-2302037-s001.pdf [file ADVS-11-2302037-s001.pdf]

## Supporting Information

for *Adv. Sci.*, DOI 10.1002/advs.202302037

EBF2 Links KMT2D-Mediated H3K4me1 to Suppress Pancreatic Cancer Progression via Upregulating KLLN

*Bing Yao\**, *Mengying Xing*, *Shixin Meng*, *Shang Li*, *Jingwan Zhou*, *Ming Zhang*, *Chen Yang*, *Shuang Qu*, *Yucui Jin*, *Hongyan Yuan*, *Ke Zen\** and *Changyan Ma\**

Supporting Information for

**EBF2 links KMT2D-mediated H3K4me1 to suppress pancreatic cancer progression via  
upregulating KLLN**

Bing Yao <sup>#\*1</sup>, Mengying Xing<sup>#1</sup>, Shixin Meng<sup>1</sup>, Shang Li<sup>1</sup>, Jingwan Zhou<sup>1</sup>, Ming Zhang<sup>1</sup>, Chen Yang<sup>2</sup>, Shuang Qu<sup>3</sup>, Yucui Jin<sup>1</sup>, Hongyan Yuan<sup>4</sup>, Ke Zen<sup>\*2</sup>, Changyan Ma<sup>\*1,5</sup>

File list:

1. Table S1
2. Table S2
3. Figure S1
4. Figure S2
5. Figure S3
6. Figure S4
7. Figure S5
8. Figure S6

**1. Table S1. List of proteins identified by Mass Spectrometry**

| No. | Protein names | Score  | Intensity H3 | Intensity H3K4me1 | No. | Protein names | Score  | Intensity H3 | Intensity H3K4me1 |
|-----|---------------|--------|--------------|-------------------|-----|---------------|--------|--------------|-------------------|
| 1   | HTATSF1       | 323.31 | 0            | 7896300000        | 267 | SRPRB         | 6.2092 | 0            | 6369800           |
| 2   | ACIN1         | 323.31 | 0            | 4538700000        | 268 | KNOP1         | 6.0187 | 0            | 11633000          |
| 3   | AP3B1         | 323.31 | 0            | 7022400000        | 269 | VAR5          | 5.9202 | 0            | 23386000          |
| 4   | SRRM2         | 311.46 | 0            | 4108200000        | 270 | USP15         | 5.8594 | 0            | 189950000         |
| 5   | MARS          | 294.58 | 0            | 1815900000        | 271 | NPM3          | 5.7768 | 0            | 130200000         |
| 6   | YBX1          | 289.03 | 0            | 982660000         | 272 | AKAP8L        | 5.6751 | 0            | 12950000          |
| 7   | RARS          | 285.78 | 0            | 3337800000        | 273 | RBM28         | 5.6321 | 0            | 93962000          |
| 8   | UBR4          | 277.05 | 0            | 2466900000        | 274 | SRCAP         | 5.4613 | 0            | 84452000          |
| 9   | EIF3C         | 249.44 | 0            | 8652500000        | 275 | PGAM5         | 5.2471 | 0            | 177960000         |
| 10  | HNRNPUL1      | 246.43 | 0            | 9168800000        | 276 | CEBPZ         | 5.1627 | 0            | 96981000          |
| 11  | EIF3L         | 237.02 | 0            | 1299900000        | 277 | MRPS34        | 4.9979 | 0            | 171250000         |
| 12  | SSBP1         | 232.46 | 0            | 1380200000        | 278 | SKIV2L2       | 4.9587 | 0            | 10405000          |
| 13  | EIF3A         | 231.93 | 0            | 3973000000        | 279 | SEC63         | 4.9458 | 0            | 68709000          |
| 14  | <b>EBF2</b>   | 228.34 | 0            | 1117500000        | 280 | MRS2          | 4.944  | 0            | 43330000          |
| 15  | SQSTM1        | 201.95 | 0            | 93569000          | 281 | KDM5B         | 4.9246 | 0            | 54916000          |
| 16  | DDX21         | 191.54 | 0            | 1351800000        | 282 | MRPL46        | 4.9129 | 0            | 38520000          |
| 17  | MRPL44        | 187.09 | 0            | 482350000         | 283 | PCNA          | 4.8947 | 0            | 132910000         |
| 18  | ZC3H18        | 177.01 | 0            | 2525800000        | 284 | SRPK2         | 4.8922 | 0            | 215950000         |
| 19  | PNN           | 176.74 | 0            | 6795000000        | 285 | RECQL         | 4.8399 | 0            | 158410000         |
| 20  | CTR9          | 176.34 | 0            | 3612700000        | 286 | NUP160        | 4.6445 | 0            | 32284000          |
| 21  | UBR5          | 173.91 | 0            | 1156600000        | 287 | HP1BP3        | 4.6364 | 0            | 116600000         |
| 22  | ANP32B        | 170.49 | 0            | 7289400000        | 288 | GPATCH8       | 4.6311 | 0            | 97992000          |
| 23  | UBTF          | 167.27 | 0            | 3916500000        | 289 | EIF6          | 4.6221 | 0            | 9906100           |
| 24  | SUPT16H       | 165.02 | 0            | 6535100000        | 290 | XPC           | 4.599  | 0            | 15627000          |
| 25  | ZC3HAV1       | 162.87 | 0            | 666660000         | 291 | BCLAF1        | 4.4624 | 0            | 264370000         |
| 26  | CSNK2A1       | 161.86 | 0            | 2541600000        | 292 | RNPS1         | 4.4449 | 0            | 109410000         |
| 27  | RPA1          | 159.91 | 0            | 1151900000        | 293 | TGFBR3        | 4.4394 | 0            | 60024000          |
| 28  | SART3         | 156.04 | 0            | 9491300000        | 294 | RPL18         | 4.427  | 0            | 1134900000        |
| 29  | PELP1         | 144.49 | 0            | 1705500000        | 295 | CHD8          | 4.4223 | 0            | 220130000         |
| 30  | VPRBP         | 142.38 | 0            | 2635900000        | 296 | MRPL40        | 4.3467 | 0            | 9106800           |
| 31  | CHD1          | 140.57 | 0            | 4252600000        | 297 | ETF1          | 4.3146 | 0            | 161510000         |
| 32  | SUPT5H        | 139.75 | 0            | 575100000         | 298 | FXR2          | 4.3006 | 0            | 10034000          |
| 33  | YTHDC2        | 137.06 | 0            | 1013900000        | 299 | VDAC3         | 4.2833 | 0            | 148810000         |
| 34  | TCOF1         | 136.86 | 0            | 1.3374E+10        | 300 | POLR2H        | 4.2578 | 0            | 30638000          |
| 35  | ANP32E        | 135.75 | 0            | 601580000         | 301 | GADD45G       | 4.2353 | 0            | 154270000         |
| 36  | SRP19         | 134.87 | 0            | 1279700000        | 302 | CCNT1         | 4.2337 | 0            | 8169600           |
| 37  | POP1          | 134.51 | 0            | 1630400000        | 303 | EIF3H         | 4.1855 | 0            | 65074000          |
| 38  | MRPL21        | 126.13 | 0            | 952400000         | 304 | SFXN1         | 4.15   | 0            | 11507000          |
| 39  | ADNP          | 121.54 | 0            | 560900000         | 305 | PSMC5         | 4.1154 | 0            | 27908000          |
| 40  | NOLC1         | 120.13 | 0            | 5982000000        | 306 | FBL           | 4.0944 | 0            | 135770000         |
| 41  | MRPS9         | 118.37 | 0            | 1088900000        | 307 | SDC4          | 4.0302 | 0            | 399050000         |
| 42  | OSBPL3        | 118.29 | 0            | 600260000         | 308 | RANBP2        | 4.0103 | 0            | 47693000          |
| 43  | MRPS35        | 114.54 | 0            | 318450000         | 309 | GNL3          | 3.9746 | 0            | 38386000          |
| 44  | SRP72         | 112.5  | 0            | 777370000         | 310 | PRPF4B        | 3.9183 | 0            | 34627000          |
| 45  | MRPL49        | 111.58 | 0            | 387310000         | 311 | POLR2A        | 3.8829 | 0            | 40259000          |
| 46  | UPF1          | 104.58 | 0            | 792370000         | 312 | SAP18         | 3.8462 | 0            | 1718400000        |
| 47  | MYBBP1A       | 104.45 | 0            | 444120000         | 313 | FAM120A       | 3.8346 | 0            | 11234000          |

|    |           |        |   |            |     |          |        |   |           |
|----|-----------|--------|---|------------|-----|----------|--------|---|-----------|
| 48 | HNRNPA3   | 103.28 | 0 | 1934600000 | 314 | MRPS22   | 3.8162 | 0 | 92141000  |
| 49 | MOV10     | 102.95 | 0 | 533520000  | 315 | RPL27A   | 3.8007 | 0 | 667330000 |
| 50 | ZFR       | 101.51 | 0 | 240470000  | 316 | ABCF2    | 3.7097 | 0 | 84742000  |
| 51 | ILF2      | 100.63 | 0 | 1817800000 | 317 | DDX24    | 3.6927 | 0 | 96521000  |
| 52 | YTHDC1    | 100.62 | 0 | 1189900000 | 318 | RALY     | 3.6885 | 0 | 165630000 |
| 53 | KANK1     | 100.29 | 0 | 204870000  | 319 | NOP56    | 3.6663 | 0 | 48512000  |
| 54 | SSRP1     | 100.06 | 0 | 3678500000 | 320 | SNRNP70  | 3.6617 | 0 | 48567000  |
| 55 | RPL7A     | 97.91  | 0 | 4769100000 | 321 | RRP1     | 3.6333 | 0 | 47194000  |
| 56 | MRPS7     | 97.44  | 0 | 781560000  | 322 | NARS2    | 3.5733 | 0 | 202130000 |
| 57 | SRP14     | 96.11  | 0 | 806630000  | 323 | RCC2     | 3.5239 | 0 | 107540000 |
| 58 | RPL3;rp13 | 95.599 | 0 | 794780000  | 324 | HSDL2    | 3.4933 | 0 | 11551000  |
| 59 | RPL6      | 94.284 | 0 | 8141500000 | 325 | PURB     | 3.4897 | 0 | 29084000  |
| 60 | SDC1      | 92.562 | 0 | 339690000  | 326 | MKI67    | 3.4549 | 0 | 6825700   |
| 61 | MRPS31    | 91.975 | 0 | 400000000  | 327 | EIF3G    | 3.447  | 0 | 7627500   |
| 62 | GEMIN5    | 89.707 | 0 | 449550000  | 328 | TRIP12   | 3.429  | 0 | 27239000  |
| 63 | BMS1      | 88.833 | 0 | 882430000  | 329 | SNRPE    | 3.411  | 0 | 190350000 |
| 64 | CHD4      | 87.379 | 0 | 1057900000 | 330 | CMTR1    | 3.3932 | 0 | 67189000  |
| 65 | CSNK2B    | 81.872 | 0 | 1079400000 | 331 | SRSF1    | 3.3601 | 0 | 79616000  |
| 66 | MRPL9     | 80.942 | 0 | 987370000  | 332 | GARS     | 3.3145 | 0 | 87683000  |
| 67 | LYAR      | 78.947 | 0 | 317120000  | 333 | CYFIP1   | 3.2795 | 0 | 10915000  |
| 68 | MRPL32    | 78.456 | 0 | 113670000  | 334 | GNL1     | 3.2446 | 0 | 37484000  |
| 69 | DAP3      | 76.701 | 0 | 1093900000 | 335 | KAT7     | 3.2375 | 0 | 41303000  |
| 70 | LARP1     | 75.466 | 0 | 2459900000 | 336 | CYR61    | 3.1639 | 0 | 77535000  |
| 71 | ALYREF    | 75.302 | 0 | 123690000  | 337 | MRPL27   | 3.1597 | 0 | 405530000 |
| 72 | CSNK2A2   | 74.896 | 0 | 686270000  | 338 | CWC22    | 3.1341 | 0 | 219580000 |
| 73 | TOP1      | 73.12  | 0 | 1988000000 | 339 | NOC3L    | 3.113  | 0 | 16120000  |
| 74 | EIF3D     | 73.023 | 0 | 136400000  | 340 | RUVBL2   | 3.1087 | 0 | 23569000  |
| 75 | IPO9      | 72.8   | 0 | 285170000  | 341 | TARS     | 3.108  | 0 | 34473000  |
| 76 | YBX3      | 71.661 | 0 | 91788000   | 342 | DDX27    | 3.0674 | 0 | 47628000  |
| 77 | XRCC6     | 70.34  | 0 | 1788800000 | 343 | FGF2     | 3.0607 | 0 | 95695000  |
| 78 | MTDH      | 69.724 | 0 | 107060000  | 344 | MRPL30   | 3.0043 | 0 | 82321000  |
| 79 | SRSF4     | 69.634 | 0 | 1304800000 | 345 | ARID4B   | 2.9889 | 0 | 19855000  |
| 80 | MEPCE     | 68.283 | 0 | 1310500000 | 346 | SRSF6    | 2.9869 | 0 | 231750000 |
| 81 | SNRPA1    | 67.446 | 0 | 1831000000 | 347 | SMC4     | 2.9812 | 0 | 12317000  |
| 82 | RPL17     | 67.111 | 0 | 707290000  | 348 | MRPL24   | 2.9591 | 0 | 375890000 |
| 83 | PAF1      | 66.293 | 0 | 1257300000 | 349 | MRPS5    | 2.8542 | 0 | 45555000  |
| 84 | MRPL37    | 65.128 | 0 | 1266000000 | 350 | STT3A    | 2.8342 | 0 | 18287000  |
| 85 | AIMP2     | 60.102 | 0 | 1394100000 | 351 | AGO2     | 2.8341 | 0 | 42849000  |
| 86 | HUWE1     | 59.885 | 0 | 241240000  | 352 | HARS2    | 2.7924 | 0 | 24467000  |
| 87 | SIN3A     | 59.318 | 0 | 147780000  | 353 | XRN1     | 2.7891 | 0 | 21950000  |
| 88 | DDB1      | 58.246 | 0 | 391740000  | 354 | MCM3     | 2.7687 | 0 | 55361000  |
| 89 | RPL9      | 57.67  | 0 | 292860000  | 355 | PUF60    | 2.7179 | 0 | 27475000  |
| 90 | HBS1L     | 57.319 | 0 | 119680000  | 356 | SMARCA1  | 2.7146 | 0 | 42301000  |
| 91 | SNRPD1    | 56.654 | 0 | 662720000  | 357 | THOC2    | 2.6787 | 0 | 26731000  |
| 92 | C1QBP     | 56.644 | 0 | 1897700000 | 358 | DDB2     | 2.6122 | 0 | 76330000  |
| 93 | CHAF1A    | 56.542 | 0 | 149660000  | 359 | AFF4     | 2.5955 | 0 | 65078000  |
| 94 | MRPS10    | 54.7   | 0 | 151040000  | 360 | HNRNPDL  | 2.5913 | 0 | 155110000 |
| 95 | MRPL23    | 54.582 | 0 | 306380000  | 361 | CENPV    | 2.5591 | 0 | 47536000  |
| 96 | KPNA1     | 53.375 | 0 | 74055000   | 362 | EIF2B5   | 2.5085 | 0 | 124100000 |
| 97 | DARS      | 52.994 | 0 | 3628000000 | 363 | MTA2     | 2.4967 | 0 | 42633000  |
| 98 | NKTR      | 52.312 | 0 | 240410000  | 364 | HSD17B10 | 2.4804 | 0 | 21611000  |

|     |          |        |   |            |     |          |        |   |           |
|-----|----------|--------|---|------------|-----|----------|--------|---|-----------|
| 99  | ATRX     | 51.138 | 0 | 427210000  | 365 | POP7     | 2.4757 | 0 | 74688000  |
| 100 | U2AF1    | 50.675 | 0 | 124020000  | 366 | RPL36A   | 2.4734 | 0 | 354030000 |
| 101 | LARP7    | 50.621 | 0 | 732800000  | 367 | KPNA3    | 2.4682 | 0 | 53524000  |
| 102 | MRPL13   | 50.194 | 0 | 625830000  | 368 | TSR1     | 2.4667 | 0 | 46266000  |
| 103 | EIF5B    | 49.981 | 0 | 1982500000 | 369 | WDR77    | 2.4553 | 0 | 29751000  |
| 104 | UBE2O    | 48.515 | 0 | 669500000  | 370 | MRPS2    | 2.446  | 0 | 54458000  |
| 105 | HNRNPUL2 | 47.353 | 0 | 81489000   | 371 | OSTC     | 2.4153 | 0 | 27290000  |
| 106 | MRPS30   | 47.289 | 0 | 335170000  | 372 | ANKRD17  | 2.4108 | 0 | 72376000  |
| 107 | RTF1     | 46.344 | 0 | 631090000  | 373 | IPO5     | 2.3681 | 0 | 15613000  |
| 108 | LUC7L3   | 45.969 | 0 | 30206000   | 374 | SON      | 2.3402 | 0 | 44968000  |
| 109 | HNRNPH3  | 45.779 | 0 | 159490000  | 375 | DIEXF    | 2.339  | 0 | 35418000  |
| 110 | SLC25A11 | 44.991 | 0 | 38404000   | 376 | DYNLL1   | 2.3234 | 0 | 53565000  |
| 111 | RRP1B    | 44.756 | 0 | 30244000   | 377 | MRPS24   | 2.3206 | 0 | 108190000 |
| 112 | TRIM26   | 44.574 | 0 | 1025200000 | 378 | EIF2AK2  | 2.3187 | 0 | 25113000  |
| 113 | CHD9     | 43.543 | 0 | 229820000  | 379 | MYO1B    | 2.315  | 0 | 30724000  |
| 114 | MRPL38   | 42.445 | 0 | 1050300000 | 380 | POLR2B   | 2.3092 | 0 | 20610000  |
| 115 | ILF3     | 41.931 | 0 | 1355400000 | 381 | PRPF8    | 2.2781 | 0 | 30614000  |
| 116 | MRPL1    | 41.059 | 0 | 247210000  | 382 | ANKRD28  | 2.2702 | 0 | 9595400   |
| 117 | MRPL4    | 39.04  | 0 | 520120000  | 383 | SART1    | 2.2564 | 0 | 29376000  |
| 118 | CHD2     | 38.685 | 0 | 58144000   | 384 | KDM5A    | 2.2454 | 0 | 37390000  |
| 119 | NAT10    | 38.676 | 0 | 284330000  | 385 | SUPT6H   | 2.2369 | 0 | 19793000  |
| 120 | MYO10    | 38.367 | 0 | 29476000   | 386 | MRPL17   | 2.2165 | 0 | 205110000 |
| 121 | NRD1     | 37.853 | 0 | 650390000  | 387 | CDC27    | 2.1971 | 0 | 53137000  |
| 122 | EHMT2    | 36.75  | 0 | 524760000  | 388 | MRPL48   | 2.19   | 0 | 27915000  |
| 123 | RPP30    | 36.684 | 0 | 101650000  | 389 | SNRPB    | 2.1489 | 0 | 442710000 |
| 124 | DDX20    | 36.006 | 0 | 107100000  | 390 | CD44     | 2.1317 | 0 | 61177000  |
| 125 | CHCHD2   | 35.844 | 0 | 414570000  | 391 | DIS3L2   | 2.0858 | 0 | 14929000  |
| 126 | U2AF2    | 35.188 | 0 | 223580000  | 392 | IGF2BP3  | 2.0529 | 0 | 16730000  |
| 127 | THUMPD1  | 35.08  | 0 | 89588000   | 393 | FARSA    | 2.0453 | 0 | 21695000  |
| 128 | AIMP1    | 34.59  | 0 | 1619300000 | 394 | RBMS2    | 2.045  | 0 | 28918000  |
| 129 | RBMX     | 34.409 | 0 | 974150000  | 395 | DRG1     | 2.0273 | 0 | 21009000  |
| 130 | GTF3C5   | 33.651 | 0 | 17588000   | 396 | RPA2     | 2.0053 | 0 | 37721000  |
| 131 | MRPL39   | 33.504 | 0 | 718740000  | 397 | BPTF     | 1.9867 | 0 | 38418000  |
| 132 | RPL32    | 33.467 | 0 | 22700000   | 398 | CSE1L    | 1.9861 | 0 | 19616000  |
| 133 | MRPS27   | 33.15  | 0 | 284230000  | 399 | ELAVL1   | 1.9392 | 0 | 63875000  |
| 134 | PSMD3    | 32.721 | 0 | 252570000  | 400 | HIST1H1D | 1.9357 | 0 | 50220000  |
| 135 | HIST1H1C | 32.678 | 0 | 7668100000 | 401 | LUC7L2   | 1.9329 | 0 | 42209000  |
| 136 | MCM4     | 32.474 | 0 | 128500000  | 402 | ZRANB2   | 1.8425 | 0 | 24065000  |
| 137 | PPP6R3   | 32.027 | 0 | 85889000   | 403 | EFTUD2   | 1.84   | 0 | 42951000  |
| 138 | CHORDC1  | 31.483 | 0 | 53583000   | 404 | COPB1    | 1.797  | 0 | 5685900   |
| 139 | PCM1     | 31.006 | 0 | 356880000  | 405 | SURF4    | 1.7851 | 0 | 43379000  |
| 140 | NCBP1    | 29.141 | 0 | 761070000  | 406 | SRRT     | 1.7831 | 0 | 35492000  |
| 141 | HLTF     | 29.004 | 0 | 158150000  | 407 | ZNF622   | 1.7801 | 0 | 33485000  |
| 142 | TPR      | 28.744 | 0 | 79484000   | 408 | XPOT     | 1.7611 | 0 | 20769000  |
| 143 | PELO     | 28.597 | 0 | 69560000   | 409 | AHCYL2   | 1.7609 | 0 | 10464000  |
| 144 | RAB5C    | 27.421 | 0 | 76752000   | 410 | STK26    | 1.7518 | 0 | 7960300   |
| 145 | UHRF1    | 27.349 | 0 | 193760000  | 411 | RGPD3    | 1.7044 | 0 | 19086000  |
| 146 | LARS     | 26.795 | 0 | 447230000  | 412 | HNRNPL   | 1.7008 | 0 | 42192000  |
| 147 | RSL1D1   | 26.481 | 0 | 308140000  | 413 | KHDRBS1  | 1.6877 | 0 | 97730000  |
| 148 | CDK9     | 26.264 | 0 | 42480000   | 414 | RBBP6    | 1.6833 | 0 | 9479400   |
| 149 | LSM2     | 26.011 | 0 | 57902000   | 415 | VKORC1   | 1.6714 | 0 | 14044000  |

|     |          |        |   |            |     |          |        |   |           |
|-----|----------|--------|---|------------|-----|----------|--------|---|-----------|
| 150 | BRIX1    | 24.804 | 0 | 268860000  | 416 | ACTR2    | 1.6711 | 0 | 18076000  |
| 151 | XRN2     | 24.146 | 0 | 325110000  | 417 | WDR3     | 1.6503 | 0 | 23264000  |
| 152 | CDK11B   | 23.995 | 0 | 2544800000 | 418 | U2SURP   | 1.6422 | 0 | 28839000  |
| 153 | EBNA1BP2 | 23.307 | 0 | 406210000  | 419 | MRPL37   | 1.6013 | 0 | 11499000  |
| 154 | AHSA1    | 23.025 | 0 | 42713000   | 420 | ATP5J2   | 1.5952 | 0 | 12636000  |
| 155 | EIF3I    | 22.974 | 0 | 830570000  | 421 | EWSR1    | 1.5843 | 0 | 15510000  |
| 156 | RPL23A   | 22.934 | 0 | 4062200000 | 422 | SBDS     | 1.5319 | 0 | 15834000  |
| 157 | RPL28    | 21.871 | 0 | 692380000  | 423 | DCAF8    | 1.5234 | 0 | 16023000  |
| 158 | DHX36    | 21.532 | 0 | 38176000   | 424 | PWP1     | 1.4951 | 0 | 20134000  |
| 159 | MRPL45   | 21.144 | 0 | 325410000  | 425 | RPL29    | 1.481  | 0 | 158670000 |
| 160 | THRAP3   | 21.033 | 0 | 131920000  | 426 | MRPL50   | 1.4798 | 0 | 31933000  |
| 161 | MRPL43   | 20.593 | 0 | 375610000  | 427 | HDAC1    | 1.4541 | 0 | 147130000 |
| 162 | MRPL2    | 20.395 | 0 | 462460000  | 428 | LSM6     | 1.4444 | 0 | 39537000  |
| 163 | DKC1     | 20.321 | 0 | 370350000  | 429 | PKN2     | 1.4279 | 0 | 7552600   |
| 164 | MYO1C    | 20.132 | 0 | 124860000  | 430 | RPS15    | 1.4235 | 0 | 247630000 |
| 165 | H2AFY    | 20.078 | 0 | 53080000   | 431 | EMG1     | 1.4163 | 0 | 45913000  |
| 166 | RPL35A   | 19.183 | 0 | 1649700000 | 432 | ZUBR1    | 1.4071 | 0 | 51455000  |
| 167 | HDGFRP2  | 19.048 | 0 | 124480000  | 433 | PYGB     | 1.3982 | 0 | 30335000  |
| 168 | PTCD3    | 19.041 | 0 | 778300000  | 434 | VAPA     | 1.393  | 0 | 53288000  |
| 169 | EIF2A    | 18.664 | 0 | 333350000  | 435 | SLC16A3  | 1.3902 | 0 | 19643000  |
| 170 | LEO1     | 18.282 | 0 | 881610000  | 436 | MRPL47   | 1.385  | 0 | 177910000 |
| 171 | MYO1E    | 18.018 | 0 | 205930000  | 437 | PHRF1    | 1.3832 | 0 | 62224000  |
| 172 | TCOF1    | 17.804 | 0 | 68357000   | 438 | JMJD6    | 1.3644 | 0 | 8421700   |
| 173 | EMD      | 17.688 | 0 | 110550000  | 439 | SF3B2    | 1.3634 | 0 | 25601000  |
| 174 | TRA2B    | 17.333 | 0 | 461930000  | 440 | RTCB     | 1.3582 | 0 | 39156000  |
| 175 | MRT04    | 17.317 | 0 | 162270000  | 441 | TRA2A    | 1.3254 | 0 | 57130000  |
| 176 | TSPYL2   | 17.132 | 0 | 193250000  | 442 | MGST1    | 1.3221 | 0 | 12387000  |
| 177 | TRMT6    | 17.132 | 0 | 41169000   | 443 | RAB6A    | 1.3148 | 0 | 10271000  |
| 178 | G3BP1    | 17.054 | 0 | 282100000  | 444 | TBC1D31  | 1.2893 | 0 | 168040000 |
| 179 | ATAD2    | 16.99  | 0 | 161340000  | 445 | PDS5B    | 1.2628 | 0 | 13142000  |
| 180 | PPP2R2A  | 16.902 | 0 | 67883000   | 446 | TGS1     | 1.2489 | 0 | 11437000  |
| 181 | GATAD2B  | 16.87  | 0 | 75360000   | 447 | PDCD11   | 1.2489 | 0 | 6719800   |
| 182 | PDCD6IP  | 16.367 | 0 | 84939000   | 448 | CDC5L    | 1.2378 | 0 | 49167000  |
| 183 | SDC2     | 16.269 | 0 | 704170000  | 449 | SLC16A1  | 1.2159 | 0 | 35473000  |
| 184 | KIAA1429 | 16.13  | 0 | 82081000   | 450 | MRPL52   | 1.2064 | 0 | 49872000  |
| 185 | WDR5     | 16.093 | 0 | 905550000  | 451 | RAB14    | 1.196  | 0 | 18492000  |
| 186 | USP39    | 15.99  | 0 | 98228000   | 452 | APEX1    | 1.1939 | 0 | 13543000  |
| 187 | SRSF10   | 15.93  | 0 | 91394000   | 453 | RB1CC1   | 1.1806 | 0 | 85266000  |
| 188 | RPS26    | 15.527 | 0 | 1552200000 | 454 | RAC1     | 1.178  | 0 | 29761000  |
| 189 | SETD1B   | 15.384 | 0 | 50299000   | 455 | ANAPC7   | 1.1767 | 0 | 13942000  |
| 190 | MRPL19   | 14.915 | 0 | 1268800000 | 456 | SNRPA    | 1.1711 | 0 | 115620000 |
| 191 | SETD1A   | 14.258 | 0 | 65851000   | 457 | ANP32A   | 1.1646 | 0 | 449110000 |
| 192 | C7orf50  | 14.241 | 0 | 28687000   | 458 | SAP30BP  | 1.1623 | 0 | 16914000  |
| 193 | RFC1     | 14.132 | 0 | 72707000   | 459 | RPP40    | 1.1601 | 0 | 18098000  |
| 194 | EIF3E    | 13.873 | 0 | 566310000  | 460 | EPB41L1  | 1.1431 | 0 | 10636000  |
| 195 | SMARCA5  | 13.66  | 0 | 339880000  | 461 | CDK2     | 1.1372 | 0 | 24090000  |
| 196 | NHP2L1   | 13.494 | 0 | 44145000   | 462 | STRAP    | 1.1281 | 0 | 38476000  |
| 197 | MRPL15   | 13.437 | 0 | 793950000  | 463 | SLC25A13 | 1.1231 | 0 | 8883900   |
| 198 | TRIM44   | 12.751 | 0 | 20472000   | 464 | DDX47    | 1.102  | 0 | 25140000  |
| 199 | NKRF     | 12.731 | 0 | 372750000  | 465 | DDX50    | 1.0847 | 0 | 13237000  |
| 200 | CFAP20   | 12.709 | 0 | 247120000  | 466 | TRIM25   | 1.0296 | 0 | 26349000  |

|     |          |        |   |            |     |         |         |   |           |
|-----|----------|--------|---|------------|-----|---------|---------|---|-----------|
| 201 | GEMIN4   | 12.592 | 0 | 206330000  | 467 | RBBP5   | 1.029   | 0 | 56774000  |
| 202 | NOP2     | 12.503 | 0 | 182870000  | 468 | SUDS3   | 1.0202  | 0 | 18576000  |
| 203 | IWS1     | 12.449 | 0 | 1924500000 | 469 | APLP2   | 1.0095  | 0 | 20417000  |
| 204 | AP3D1    | 12.246 | 0 | 285840000  | 470 | FLII    | 1.0044  | 0 | 54608000  |
| 205 | MRPS18B  | 12.141 | 0 | 106150000  | 471 | ZZEF1   | 0.99944 | 0 | 7008900   |
| 206 | COPA     | 11.884 | 0 | 91198000   | 472 | YARS    | 0.99138 | 0 | 10924000  |
| 207 | MORF4L2  | 11.817 | 0 | 87947000   | 473 | RPS10   | 0.98946 | 0 | 16148000  |
| 208 | RRP9     | 11.775 | 0 | 249040000  | 474 | DROSHA  | 0.9851  | 0 | 23753000  |
| 209 | MSH6     | 11.611 | 0 | 90444000   | 475 | PHF8    | 0.96102 | 0 | 8176600   |
| 210 | EIF3G    | 11.514 | 0 | 440120000  | 476 | BRD2    | 0.94978 | 0 | 14359000  |
| 211 | RBM39    | 11.339 | 0 | 50703000   | 477 | FTSJ3   | 0.93238 | 0 | 133180000 |
| 212 | BUB3     | 11.134 | 0 | 105580000  | 478 | ABCF3   | 0.92995 | 0 | 5264900   |
| 213 | RPL27    | 10.83  | 0 | 403110000  | 479 | DDX19A  | 0.91998 | 0 | 22568000  |
| 214 | KPNA4    | 10.714 | 0 | 375760000  | 480 | ATP5L   | 0.91901 | 0 | 22361000  |
| 215 | RPS24    | 10.695 | 0 | 181830000  | 481 | OLA1    | 0.91591 | 0 | 77902000  |
| 216 | HIST1H1B | 10.668 | 0 | 1130900000 | 482 | TLN2    | 0.91357 | 0 | 157200000 |
| 217 | TROVE2   | 10.663 | 0 | 193260000  | 483 | USP7    | 0.91171 | 0 | 23650000  |
| 218 | HIST1H1A | 10.064 | 0 | 69507000   | 484 | MRPS17  | 0.91035 | 0 | 20804000  |
| 219 | USP34    | 10.027 | 0 | 134710000  | 485 | H1FO    | 0.90818 | 0 | 176040000 |
| 220 | PRMT5    | 9.8984 | 0 | 82474000   | 486 | CCPG1   | 0.90635 | 0 | 27975000  |
| 221 | PABPN1   | 9.8053 | 0 | 45860000   | 487 | CHERP   | 0.89254 | 0 | 18251000  |
| 222 | NOC2L    | 9.7955 | 0 | 955940000  | 488 | RPP25L  | 0.89134 | 0 | 10917000  |
| 223 | MRPL3    | 9.6545 | 0 | 388970000  | 489 | NAA10   | 0.89128 | 0 | 12172000  |
| 224 | EEF1E1   | 9.5625 | 0 | 500340000  | 490 | PSMD5   | 0.89026 | 0 | 6231200   |
| 225 | PPP1R12A | 9.4533 | 0 | 232110000  | 491 | SNRPF   | 0.8777  | 0 | 50340000  |
| 226 | NIFK     | 9.2011 | 0 | 194060000  | 492 | CAPN13  | 0.87264 | 0 | 38295000  |
| 227 | SRPK1    | 9.0009 | 0 | 165410000  | 493 | LARP4   | 0.86611 | 0 | 6340000   |
| 228 | ASPH     | 8.9914 | 0 | 42969000   | 494 | METAP2  | 0.85846 | 0 | 44724000  |
| 229 | NCAPH    | 8.9325 | 0 | 72607000   | 495 | ANK3    | 0.85588 | 0 | 255060000 |
| 230 | PRPF19   | 8.7914 | 0 | 259950000  | 496 | MRPL34  | 0.8529  | 0 | 43214000  |
| 231 | PPM1G    | 8.6643 | 0 | 238980000  | 497 | ICT1    | 0.84966 | 0 | 260530000 |
| 232 | DNTTIP2  | 8.6196 | 0 | 51143000   | 498 | MRPL33  | 0.84339 | 0 | 26026000  |
| 233 | DHX57    | 8.5614 | 0 | 65578000   | 499 | CAV1    | 0.84157 | 0 | 53113000  |
| 234 | BCR      | 8.5399 | 0 | 52712000   | 500 | SDE2    | 0.83853 | 0 | 714480000 |
| 235 | MRPL28   | 8.4658 | 0 | 436970000  | 501 | ATAD3A  | 0.83604 | 0 | 6033900   |
| 236 | EHMT1    | 8.313  | 0 | 363160000  | 502 | MTCH2   | 0.82464 | 0 | 4415300   |
| 237 | RAB21    | 8.2978 | 0 | 44536000   | 503 | MLLT1   | 0.82284 | 0 | 21763000  |
| 238 | ZCCHC10  | 8.2069 | 0 | 74648000   | 504 | HERC2   | 0.82023 | 0 | 8769200   |
| 239 | GPC1     | 8.1677 | 0 | 281460000  | 505 | CIRBP   | 0.80148 | 0 | 20086000  |
| 240 | PRPS1    | 8.1305 | 0 | 86873000   | 506 | RBM3    | 0.79563 | 0 | 21237000  |
| 241 | TRMT61A  | 8.1067 | 0 | 247350000  | 507 | DDX23   | 0.76751 | 0 | 9385600   |
| 242 | LBR      | 7.9991 | 0 | 34970000   | 508 | ESYT1   | 0.766   | 0 | 8163200   |
| 243 | WIZ      | 7.9716 | 0 | 60601000   | 509 | MRPS18A | 0.76232 | 0 | 187570000 |
| 244 | SNRPD2   | 7.964  | 0 | 1367000000 | 510 | GTPBP4  | 0.76128 | 0 | 31063000  |
| 245 | CENPB    | 7.9572 | 0 | 302150000  | 511 | MORC3   | 0.75093 | 0 | 10826000  |
| 246 | MRPL20   | 7.8099 | 0 | 673180000  | 512 | BIRC2   | 0.746   | 0 | 10420000  |
| 247 | NCBP2    | 7.8038 | 0 | 178110000  | 513 | SDAD1   | 0.73938 | 0 | 10724000  |
| 248 | MRPS25   | 7.7768 | 0 | 55992000   | 514 | KANK2   | 0.72957 | 0 | 23980000  |
| 249 | POP4     | 7.7508 | 0 | 23946000   | 515 | MAP2K3  | 0.72537 | 0 | 12829000  |
| 250 | RANGAP1  | 7.6909 | 0 | 32277000   | 516 | RPP25   | 0.7242  | 0 | 57526000  |
| 251 | CTDP1    | 7.6488 | 0 | 9107100    | 517 | CDK18   | 0.70898 | 0 | 283270000 |

|     |         |        |   |           |     |          |         |   |           |
|-----|---------|--------|---|-----------|-----|----------|---------|---|-----------|
| 252 | CHD3    | 7.5987 | 0 | 167930000 | 518 | MAP2K2   | 0.70599 | 0 | 7107200   |
| 253 | PICALM  | 7.5079 | 0 | 5716300   | 519 | CSNK1A1  | 0.69604 | 0 | 100810000 |
| 254 | TMEM33  | 7.3898 | 0 | 48582000  | 520 | MRPS23   | 0.69348 | 0 | 22728000  |
| 255 | CMAS    | 7.3057 | 0 | 72763000  | 521 | RPL36    | 0.68738 | 0 | 61609000  |
| 256 | ESF1    | 7.1547 | 0 | 105780000 | 522 | ADAR     | 0.68158 | 0 | 6643300   |
| 257 | NOP58   | 7.1129 | 0 | 93309000  | 523 | DST      | 0.68073 | 0 | 11345000  |
| 258 | DDX18   | 7.0385 | 0 | 67938000  | 524 | ARL2     | 0.66001 | 0 | 7923500   |
| 259 | EIF3K   | 7.037  | 0 | 66541000  | 525 | SSR3     | 0.65757 | 0 | 28405000  |
| 260 | IGF2BP1 | 6.8127 | 0 | 71858000  | 526 | CDC23    | 0.65467 | 0 | 21910000  |
| 261 | DHFR    | 6.6955 | 0 | 45311000  | 527 | DYNC1H1  | 0.65256 | 0 | 5615700   |
| 262 | SRSF7   | 6.6158 | 0 | 349980000 | 528 | GATAD2A  | 0.6523  | 0 | 9298600   |
| 263 | H1FX    | 6.5894 | 0 | 461120000 | 529 | CARD18   | 0.64474 | 0 | 14770000  |
| 264 | MAP4    | 6.5123 | 0 | 152000000 | 530 | ARHGEF10 | 0.63716 | 0 | 12303000  |
| 265 | MRPL22  | 6.4563 | 0 | 395150000 | 531 | MRPL35   | 0.62419 | 0 | 18545000  |
| 266 | PURA    | 6.2532 | 0 | 37329000  |     |          |         |   |           |

**2. Table S2. Clinicopathologic characteristics of EBF2 and KMT2D expression in PCa patients**

| Characteristics          | Cases | IHC score of EBF2 |                      | IHC score of KMT2D |                      |
|--------------------------|-------|-------------------|----------------------|--------------------|----------------------|
|                          |       | Mean±s.d.         | P value <sup>a</sup> | Mean±s.d.          | P value <sup>a</sup> |
| <b>Age</b>               |       |                   |                      |                    |                      |
| > 50                     | 73    | 90.89 ± 6.556     | 0.4413               | 81.16 ± 5.558      | 0.6513               |
| ≤50                      | 17    | 102.9 ± 15.88     |                      | 87.06 ± 12.51      |                      |
| <b>Grade</b>             |       |                   |                      |                    |                      |
| <i>I-II</i>              | 53    | 111.7 ± 7.903     | 0.0002               | 100.3 ± 8.1        | 0.0135               |
| <i>III-III</i>           | 37    | 66.62 ± 7.752     |                      | 147.6 ± 12.2       |                      |
| <b>Tumor Size</b>        |       |                   |                      |                    |                      |
| <i>T1- T2</i>            | 44    | 117.6 ± 9.506     | <0.0001              | 105.6 ± 7.561      | <0.0001              |
| <i>T3-T4</i>             | 45    | 69.56 ± 6.111     |                      | 59.56 ± 5.032      |                      |
| <b>Lymph node status</b> |       |                   |                      |                    |                      |
| <i>N0</i>                | 32    | 116.1 ± 12.03     | 0.0017               | 100.2 ± 9.206      | 0.0018               |
| <i>N1-2</i>              | 56    | 77.5 ± 5.800      |                      | 69.11 ± 5.073      |                      |
| <b>Metastasis</b>        |       |                   |                      |                    |                      |
| <i>M0</i>                | 66    | 103.3 ± 7.437     | 0.0050               | 88.48 ± 6.344      | 0.0414               |
| <i>M1</i>                | 24    | 65.21 ± 7.805     |                      | 65.21 ± 6.486      |                      |
| <b>Survival</b>          |       |                   |                      |                    |                      |
| <i>Yes</i>               | 7     | 224.3 ± 18.50     | <0.0001              | 180.7 ± 14.24      | <0.0001              |
| <i>No</i>                | 83    | 82.11 ± 4.720     |                      | 73.98 ± 4.257      |                      |

<sup>a</sup> P values were derived using Student's *t*-test to compare values for the two parameters in each category.



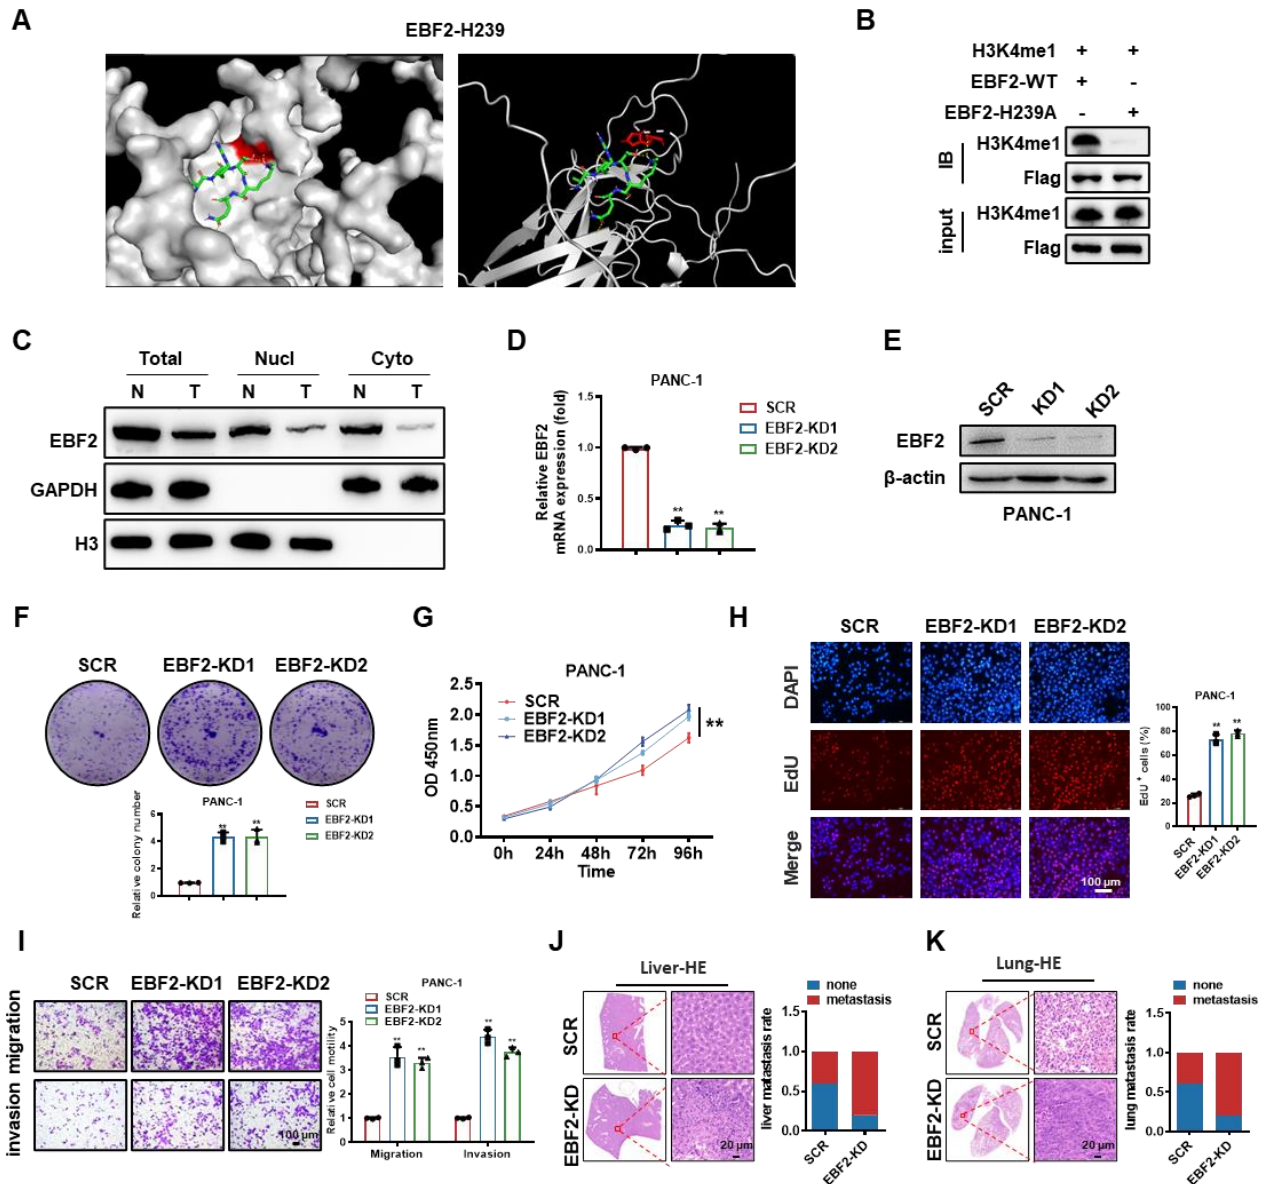

**3. Figure S1. EBF2 inhibits PADC cell proliferation and metastasis *in vitro* and *in vivo*.** A) Overall structure of the EBF2-H3K4me1 complex. Gray, EBF2; red, His239 (H239) of EBF2; green, a H3K4me1-containing histone H3 tail peptide. B) Co-IP assay to determine the interactions between Flag-tagged EBF2-WT or EBF2-H239A and H3K4me1 in SW1990 cells. C) Cellular distribution of EBF2 in normal pancreatic and PC tissue. D-E) The mRNA (D) and protein expression (E) of EBF2 in EBF2-depleted PANC-1 cells verified by qPCR and Western blot assays. Data in D are presented as mean  $\pm$  SEM, \*\* $P$ <0.01 by one-way ANOVA test. F-I) Colony-formation (F), CCK-8 (G), EdU incorporation (H) and Transwell assays (I) assessed the effects of EBF2 knockdown on proliferation, migration and invasion of PANC-1 cells *in vitro*. Data in F-I are presented as mean  $\pm$  SEM, \*\* $P$ <0.01 by two-way ANOVA test (G) and one-way ANOVA test (F, H and I). J-K) H&E staining showed that both liver (J) and lung metastasis rates (K) were increased in mice injected with EBF2-KD SW1990-luc cells. Scale bar, 20 $\mu$ m.

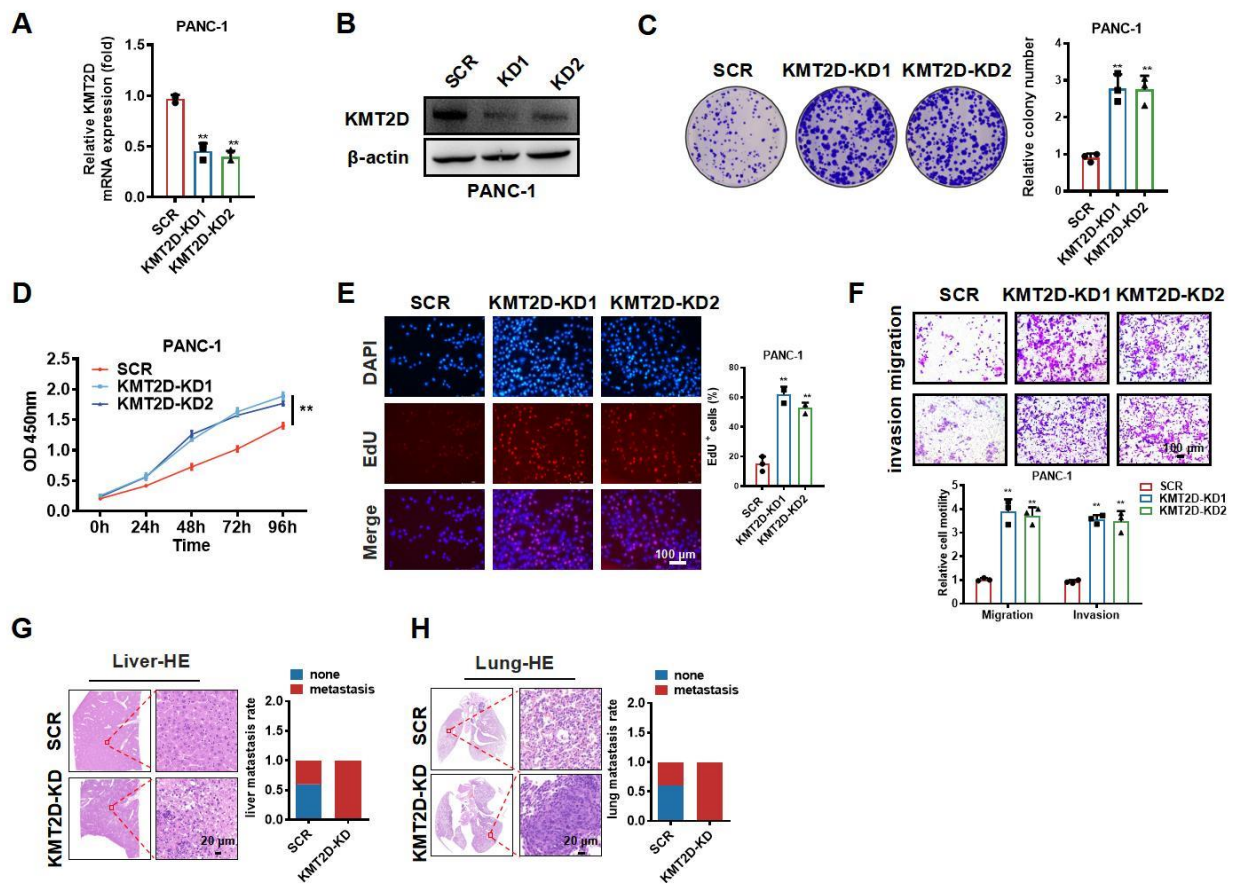

**4. Figure S2. KMT2D inhibits cell proliferation and metastasis *in vitro* and *in vivo*.** A-B) The mRNA (A) and protein (B) levels of KMT2D in KMT2D-depleted PANC-1 cells verified by qPCR and Western blot assays. Data in A are presented as mean  $\pm$  SEM, \*\* $P < 0.01$  by one-way ANOVA test. C-F) Colony-formation (C), CCK-8 (D), EdU incorporation (E) and Transwell (F) assays assessed the effects of KMT2D knockdown on proliferation, migration and invasion of PANC-1 cells *in vitro*. Data in C-F are presented as mean  $\pm$  SEM, \*\* $P < 0.01$  by two-way ANOVA test (D) and one-way ANOVA test (C, E and F). G-H) H&E staining showed that both liver (G) and lung (H) metastasis rates increased in mice injected with KMT2D-KD SW1990-luc cells. Scale bar, 20 $\mu$ m.

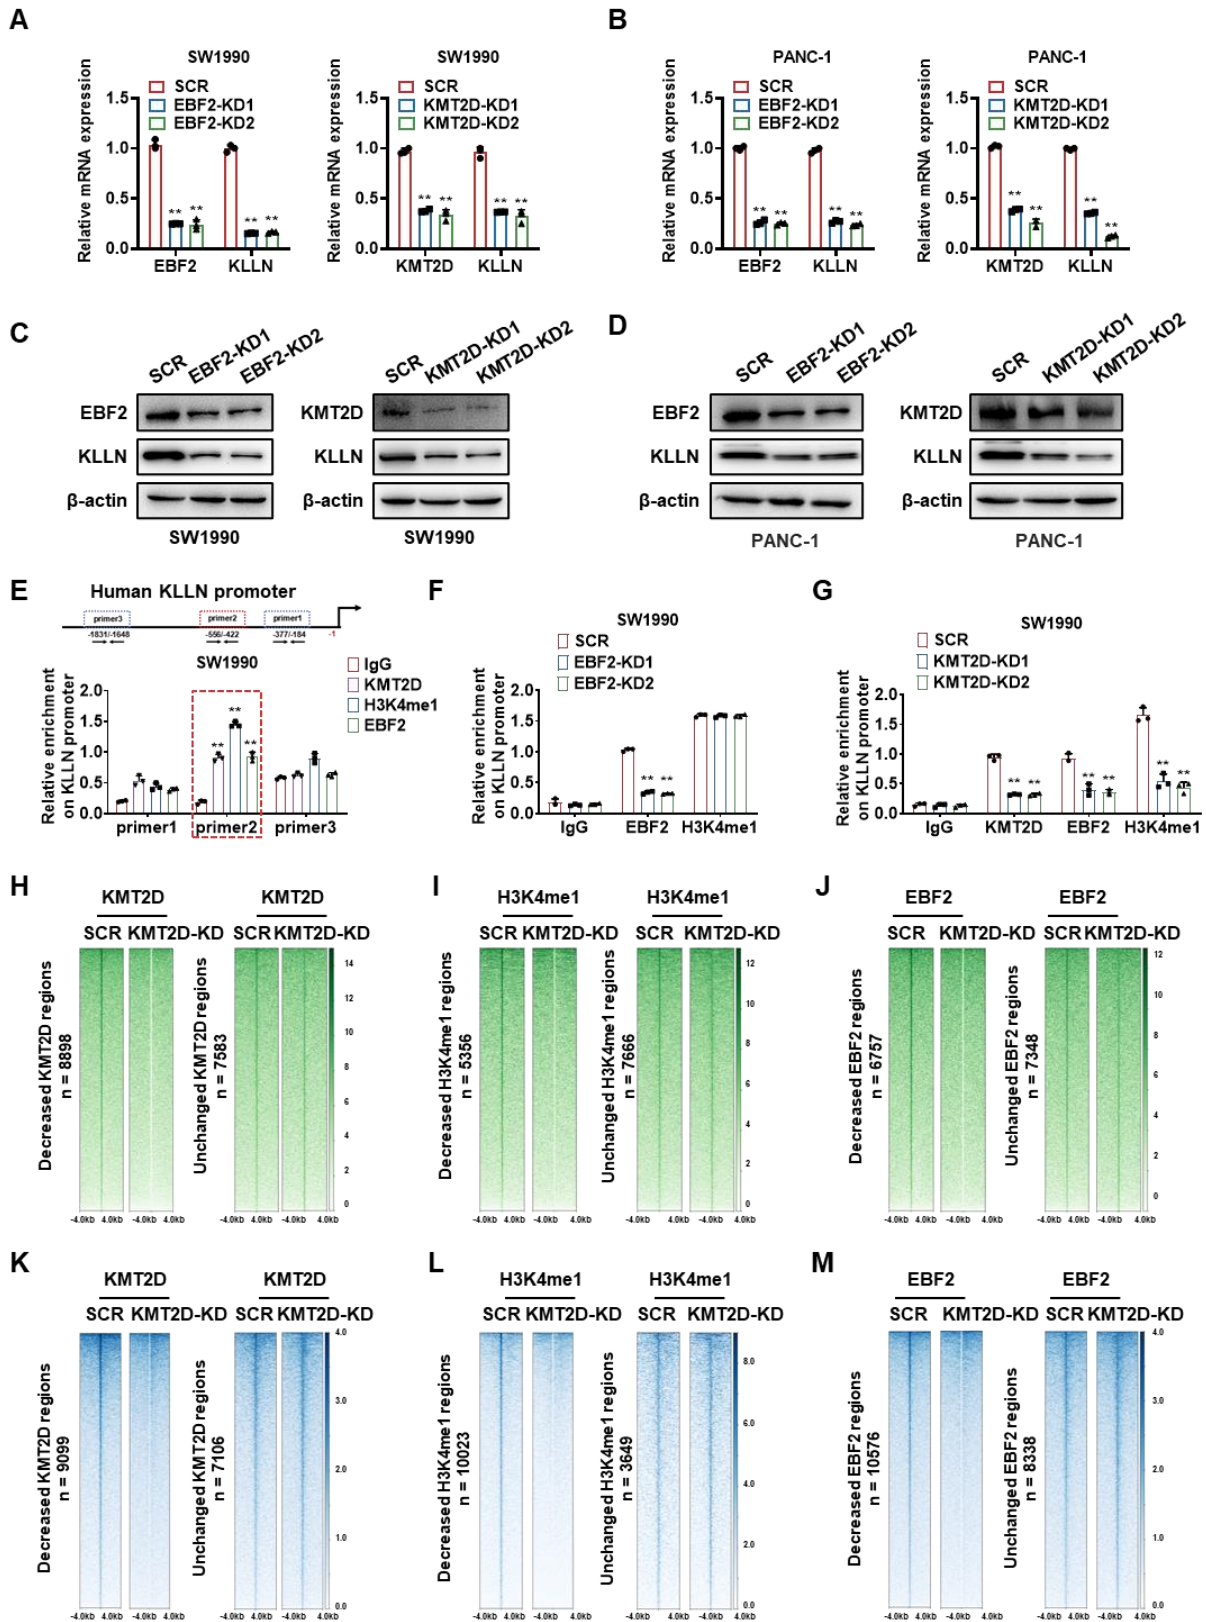

**5. Figure S3. KLLN is a common transcriptional target of KMT2D and EBF2 in PDAC cells.** A-B) qRT-PCR analysis of KLLN mRNA level in EBF2 or KMT2D-depleted SW1990 (A) and PANC-1 (B) cells. Data in A-B are presented as mean  $\pm$  SEM,  $**P < 0.01$  by one-way ANOVA test. C-D) Western blot analysis of KLLN

protein level in EBF2 or KMT2D-depleted SW1990 (C) and PANC-1 (D) cells. E) ChIP analysis of KMT2D, H3K4me1 and EBF2 binding to the promoter region of KLLN gene in SW1990 cells. F) ChIP-qPCR analysis of EBF2 and H3K4me1 bindings to the TSS and promoter regions of KLLN in SCR, EBF2-KD1 and EBF2-KD2 SW1990 cells. G) ChIP-qPCR analysis of KMT2D, EBF2 and H3K4me1 bindings to the TSS and promoter regions of KLLN in SCR, KMT2D-KD1 and KMT2D-KD2 SW1990 cells. Data in E-G are presented as mean  $\pm$  SEM,  $**P < 0.01$  by Student's *t*-test (E) and one-way ANOVA test (F and G). H) Heatmap of input normalized KMT2D ChIP signal in control (SCR), KMT2D-KD over 8898 distal KMT2D regions with decreased signals in KMT2D-KD and 7583 distal KMT2D regions with invariable signals, with regions sorted by strength of KMT2D signal. I) Heatmap of input normalized H3K4me1 ChIP signal in SCR and KMT2D-KD over 5356 distal H3K4me1 regions with decreased signals in KMT2D-KD and 7666 distal H3K4me1 regions with invariable signals, with regions sorted by strength of H3K4me1 signal. J) Heatmap of input normalized EBF2 ChIP signal in SCR and KMT2D-KD over 6757 distal EBF2 regions with decreased signals in KMT2D-KD and 7348 distal EBF2 regions with invariable signals, with regions sorted by strength of EBF2 signal. K) Heatmap of KMT2D CUT&Tag signal in SCR and KMT2D-KD with regions sorted by strength of KMT2D signal. L) Heatmap of H3K4me1 CUT&Tag signals in SCR and KMT2D-KD with regions sorted by strength of H3K4me1 signal. M) Heatmap of EBF2 CUT&Tag signals in SCR and KMT2D-KD with regions sorted by strength of EBF2 signal.

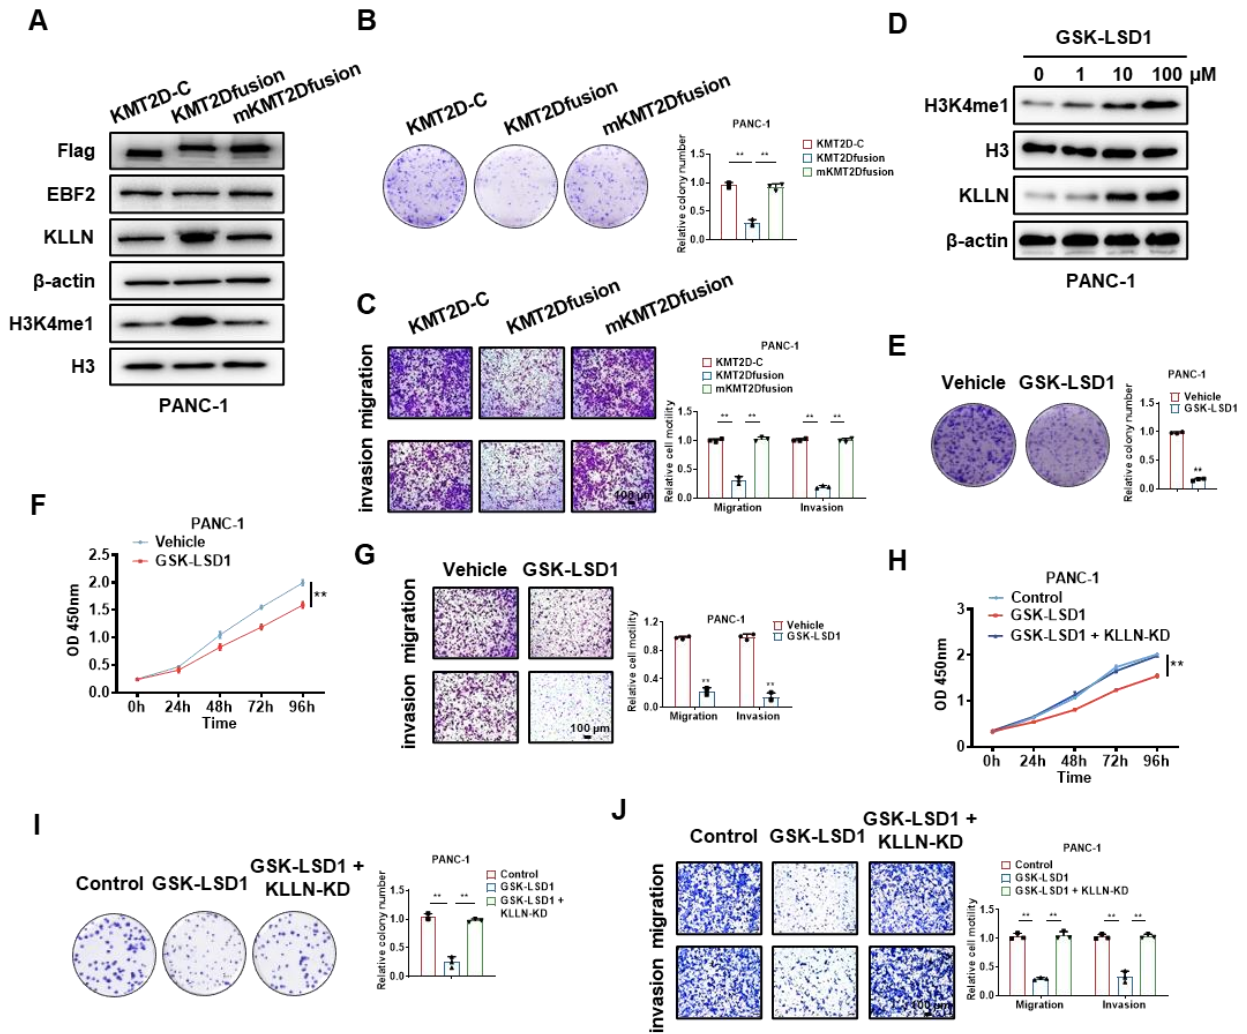

**5. Figure S4. GSK-LSD1 inhibits the proliferation, migration and invasion of PDAC cells.** A) Western blot analysis of KLLN and H3K4me1 levels in PANC-1 cells transfected with KMT2D-C, KMT2D<sub>fusion</sub> and mKMT2D<sub>fusion</sub>. B-C) Colony-formation (B) and Transwell (C) assays of PANC-1 cells transfected with KMT2D-C, KMT2D<sub>fusion</sub> and mKMT2D<sub>fusion</sub>. Data in B-C are presented as mean ± SEM, \*\**P*<0.01 by one-way ANOVA test. D) Western blot analysis of H3K4me1 and KLLN levels in PANC-1 cells treated with 0, 1, 10 or 100μM GSK-LSD1. E-G) Colony-formation (E), CCK-8 (F) and Transwell (G) assays of PANC-1 cells treated with Vehicle and GSK-LSD1. Data in E-G are presented as mean ± SEM, \*\**P*<0.01 by Student's *t*-test (E and G), two-way ANOVA test (F). H-J) CCK-8 (H), colony-formation (I) and Transwell (J) assays were used to detect the proliferation, migration and invasion of control, GSK-LSD1 and GSK-LSD1 + KLLN PANC-1 cells. Data in H-J are presented as mean ± SEM, \*\**P*<0.01 by two-way ANOVA test (H), one-way ANOVA test (I-J).

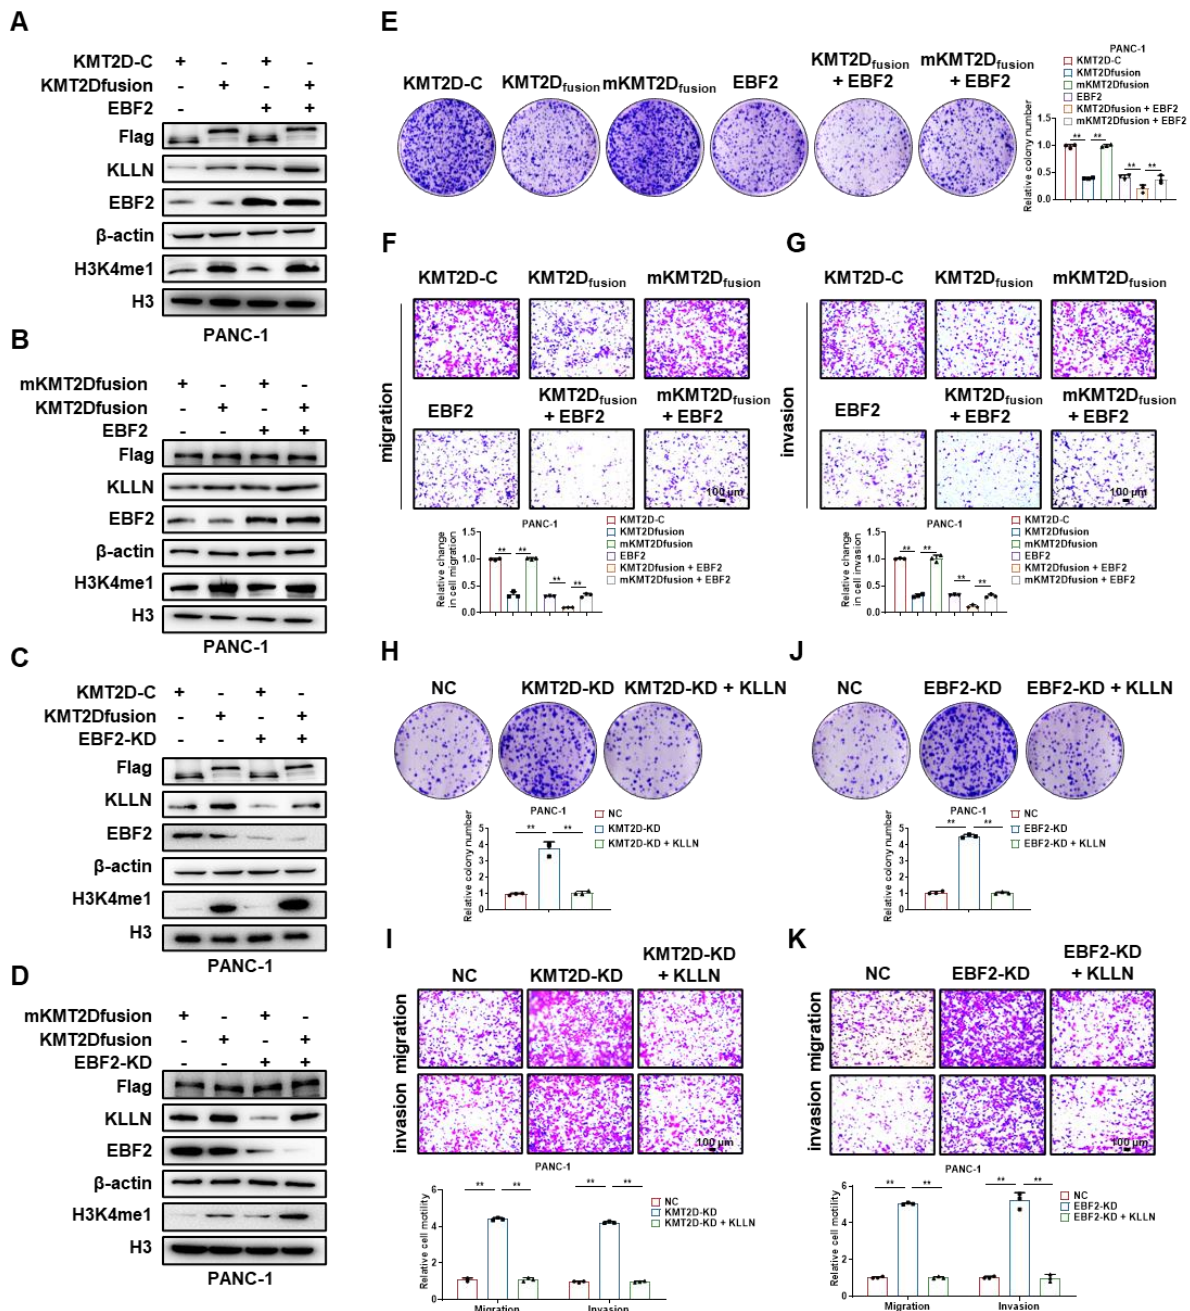

**6. Figure S5. KMT2D and EBF2 cooperate to activate the expression of KLLN.** A) Western blot analysis of KLLN and H3K4me1 levels in PANC-1 cells transfected with KMT2D-C, KMT2D<sub>fusion</sub> or EBF2. B) Western blot analysis of KLLN and H3K4me1 levels in PANC-1 cells transfected with mKMT2D<sub>fusion</sub>, KMT2D<sub>fusion</sub> or EBF2. C) Western blot analysis of KLLN and H3K4me1 levels in PANC-1 cells transfected with KMT2D-C, KMT2D<sub>fusion</sub> or EBF2-KD. D) Western blot analysis of KLLN and H3K4me1 levels in PANC-1 cells transfected with mKMT2D<sub>fusion</sub>, KMT2D<sub>fusion</sub> or EBF2-KD. β-actin and H3 were used as protein loading control. E-G) Colony-formation (E), migration (F) and invasion (G) assays of PANC-1 cells treated with KMT2D-C, KMT2D<sub>fusion</sub>, mKMT2D<sub>fusion</sub>, EBF2, KMT2D<sub>fusion</sub> + EBF2, mKMT2D<sub>fusion</sub> + EBF2. H-I) Colony-formation (H), Transwell (I) assays of PANC-1 cells transfected with NC, KMT2D-KD or KMT2D-KD +

KLLN. J-K) Colony-formation (J), Transwell (K) assays of PANC-1 cells transfected with NC, EBF2-KD or EBF2-KD + KLLN. Data in E-K are presented as mean  $\pm$  SEM,  $**P < 0.01$  by one-way ANOVA test.

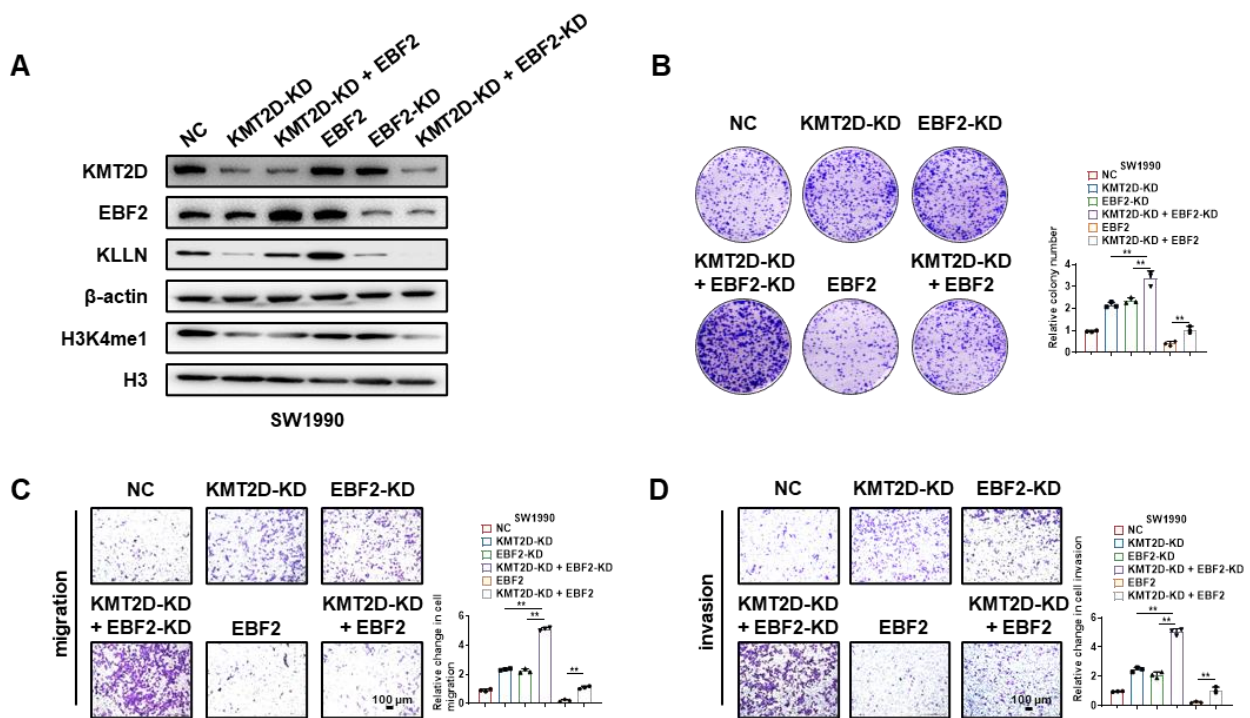

**7. Figure S6. EBF2 and KMT2D cooperate to inhibit the proliferation, migration and invasion of PDAC cells *in vitro*.** A) Western blot analysis of KLLN and H3K4me1 levels in NC, KMT2D-KD, KMT2D-KD+EBF2, EBF2, EBF2-KD or KMT2D-KD+EBF2-KD SW1990 cells. B-D) Colony-formation (B) and migration (C) and invasion (D) assays of PANC-1 cells with NC, KMT2D-KD, KMT2D-KD + EBF2, EBF2, EBF2-KD or KMT2D-KD+EBF2-KD. Data in B-D are presented as mean  $\pm$  SEM,  $**P < 0.01$  by one-way ANOVA test.
